## Current Bibliography.

Prepared by the Editor with the assistance of Miss Thursby-Pelham.

**NOTE.** The scope of the Bibliography is limited in the main to the area covered by the Council's activities, but there are included papers of general interest relating to other areas in the North Temperate and Arctic regions and exceptionally elsewhere. Limnological references are not as a rule given, but papers relating to brackish waters and to salmon and freshwater fish studied by the Council are included.

The classification of entries follows in a general way that adopted in Dr. Allen's Selected Bibliography published in Vol. I, Nos. 1 and 2 of the Journal, and since reprinted (Price, 1 Kr.).

Subscribers and those on the distribution list will receive regularly upon application to the Administrative Secretary copies of the Bibliography printed on one side of the page only, for use in making up card indices.

The Editor will be glad to be advised of emendations and additions to the Bibliography.

## Physical and Biological Conditions in the Sea.

### GENERAL HYDROGRAPHY

- ANON. Definition of the words "Hydrographer" and "Hydrography". *Hydrogr. Rev.*, XI, No. 1, 8—11, Monaco, 1934.
- ANON. Eine Anregung zur Meeres- und Polarforschung. *Hansa*, 18, 1934.
- du BATY, R. R. Montagnes et Vallées sous-marines du Golfe de Gascogne. *Journ. du Conseil*, IX, 181—85, Copenhagen, 1934.
- BEAUGÉ, L. L'emploi du sondeur sonore dans une reconnaissance rapide des bancs sous-marins. *Pêche Marit., Pêche Fluviale et Piscicult.*, XVII, 163—64, 1934.
- COLLIN, L. Les Vallées sous-marines de la côte ouest du Finistère. *Bull. Soc. d'Océanogr. de France*, XIV, 1355—70, 1934.
- DEMEL, K. et DŁUSKI, S. Compte-Rendu d'une excursion scientifique sur le banc central de la Baltique. *Arch. Hydrobiol. et d'Ichtyol.*, VIII, 48—74, Suwalki, 1934. (In Polish, French Résumé).
- GARDINER, J. S. L'Expédition du John Murray dans l'Océan Indien. *Rev. des Trav.*, VII, 99—102, Paris, 1934.
- GARDINER, J. S. The John Murray Expedition. II. *Marine Observer*, XI, 109, 1934.
- GARDINER, J. S. The John Murray Expedition to the Indian Ocean. *Geogr. Journ.* LXXXIV, 154—56, London, 1934.
- HARVEY, H. W. Hydrography of the Mouth of the English Channel, 1929—1932. *Journ. Mar. Biol. Assoc., U.K., N.S.* XIX, 737—46, Plymouth, 1934.
- HELLAND-HANSEN, B. The Sognefjord Section. Oceanographic Observations in the Northernmost Part of the North Sea and the Southern Part of the Norwegian Sea. *James Johnstone Mem. Volume*, 257—74, Liverpool, 1934.
- HENRY, J. Réduction d'une sonde. *Bull. Soc. d'Océanogr. de France*, XIV, 1371, Paris, 1934.

- Japan. Semi-annual Report Oceanographical Investigation (July—December, 1933). Imp. Fish. Exper. Stat., Tokyo, Japan, No. 53, 1934.
- John, D. D. The second Antarctic Commission of the R. R. S. Discovery. II. Geogr. Journ., LXXXIII, 381—93, London, 1934.
- Jones, G. C. Gasoline Driven Sounding Machine, another Type. Field Eng. Bull. Coast and Geodet. Survey, Washington, June 1934.
- Knox, R. W. Gasoline Driven Sounding Machine. Field Eng. Bull. Coast and Geodet. Survey, Washington, June 1934.
- Marmer, H. A. Oceanography, the Science of the Sea. Scientia, LVI, (7), 1—8, Bologna, 1934.
- Marmer, H. A. The Scope of Oceanography. James Johnstone Mem. Volume, 22—34, Liverpool, 1934.
- Parker, W. E. Velocity of Sound in Sea Water. Field Eng. Bull. Coast and Geodet. Survey, Washington, June 1934.
- Pettersson, H. The "Johannes Schmidt" Ridge in the Indian Ocean. Nature, CXXXIV, 29, 1934.
- Rauschelbach, H. Die Hochseepegelbeobachtungen im südlichen Kattegat im August 1931. Ann. der Hydrogr. usw., LXII, 177—85, Berlin, 1934.
- Rauschelbach, H. Die Hochseepegelbeobachtungen im südlichen Kattegat im August 1931. Ann. der Hydrogr. usw., LXII, 233—50, Berlin, 1934.
- Scordia, C. Per la biologia del Tonno (*Thunnus thynnus* L.). IV. Osservazioni eseguite nelle tonnare di Bivona e di Pizzo (Calabria) nel Maggio-Giugno 1931. Mem. di Biol. Mar. e di Oceanogr., II, N. 2, Messina, 1933.
- Scordia, C. Per la biologia del Tonno (*Thunnus thynnus* L.). V. Osservazioni eseguite nelle tonnare di Bivona (Calabria) nel Giugno 1932, con riferimenti alle tonnare di Pizzo e di Mezzapraia. Mem. di Biol. Mar. e di Oceanogr., III, N. 1, Messina, 1934.
- Scordia, C. e Mazzarelli, G. Osservazioni idrologiche eseguite nello Stretto di Messina. Mem. di Biol. Mar. e di Oceanogr., II, N. 3, Messina, 1934.
- Soot-Ryen, T. Hydrographical investigations in the Ramfiord 1924—25. Tromsø Mus. Årshefter LI, (4), 5—21, 1932.
- Sverdrup, H. U. Oversikt over "Maud"-ekspedisjonens videnskapelige resultater. Beretn. Chr. Michelsens Inst. f. Vid., Bd. IV, Bergen, 1934.
- Uda, M. The results of simultaneous oceanographical investigations in the Japan sea and its adjacent waters in May and June, 1932. Journ. Imp. Fish. Exper. Stat., No. 5, 57—190, Tokyo, 1934. (In Japanese, English Résumé).
- Vallaux, C. Les hypothèses sur la circulation océanique profonde. Scientia, LV, N. CCLXVI—6, 409—17, Series III, Bologna, 1934.
- Vaughan, T. W. Report of the Standing Committee on the Oceanography of the Pacific. Proc. Fifth Pacific Scient. Congr. 1933. App. I, 245—384, Toronto, 1934.
- Wiese, W. Lotungen ausgeführt von der Expedition mit dem Eisbrecher "Sibirjakow" im Jahre 1932. Trans. Arctic Inst., X, 125—30, Leningrad, 1933. (In Russian and German).
- Wüst, G. Neue Anschauungen über Eisberge. Petermanns Mitt., LXXX, 176, 1934.
- Wyatt, A. G. N. Surveying Cruises of H. M. S. Challenger off the Coast of Labrador in 1932 and 1933. Geogr. Journ., LXXXIV, 33—53, London, 1934.

### Physics and Chemistry of Sea Water.

- Buch, K. Beobachtungen über chemische Faktoren in der Nordsee, zwischen Nordsee und Island sowie auf dem Schelfgebiete nördlich von Island. Cons. Perm. Internat. p. l'Explor. de la Mer, Rapp. et Proc.-Verb., LXXXIX, 3ème partie, 13—31, Copenhagen, 1934.
- Cooper, L. H. N. The Variation of Excess Base with Depth in the English Channel with reference to the Seasonal Consumption of Calcium by Plankton. Journ. Mar. Biol. Assoc., U. K., N. S. XIX, 747—54, Plymouth, 1934.
- Mitchell, P. H. and Rakestraw, N. W. The Buffer Capacity of Sea Water. Biol. Bull., Woods Hole, Mass., LXV, 437—51, 1934.
- Orr, A. P. and Moorhouse, F. W. Variations in some physical and chemical conditions on and near Low Isles Reef. Great Barrier Reef Exped. 1928—29, Sci. Rep. II, 87—98, Brit. Mus. (Nat. Hist.), London, 1933.
- Orr, A. P. and Moorhouse, F. W. Physical and Chemical Conditions in Mangrove Swamps. Great Barrier Reef Exped. 1928—29, Sci. Rep. II, 102—10, Brit. Mus. (Nat. Hist.), London, 1933.
- Rakestraw, N. Studies on the Biology and Chemistry of the Gulf of Maine. I. Chemistry of the waters of the Gulf of Maine in August, 1932. Biol. Bull., Woods Hole, Mass., LXIV, 149—58, 1933.
- Thompson, T. G. and Moberg, E. G. Some problems of oceanographical chemistry. Scientific Monthly, New York, May 1932.

## TEMPERATURE AND SALINITY

- Buch, K. und Gustafsson, C. Der Salz- und Temperaturfehler von Thymolblau. Journ. du Conseil, IX, 173—80, Copenhagen, 1934.
- Demel, K. Température des eaux cotières polonaises de la Baltique en 1932—33. Arch. Hydrobiol. et d'Ichthyol., VII, 27—37, Suwalki, 1934. (In Polish, French Résumé).
- Eggvin, J. Oceanographic Conditions at certain Norwegian Fishing Grounds. Cons. Perm. Internat. p. l'Explor. de la Mer, Rapp. et Proc.-Verb., LXXXVIII, No. IV, Copenhagen, 1934.
- Griesel, R. Die Beziehungen zwischen Gezeiten, Strömungen und Salzgehalt in der Trave. Mitt. d. Naturhist. Mus., 2. Reihe, H. 37, Lübeck, 1934.
- Hachey, H. B. The Trend of Water Temperatures on our Atlantic Seaboard. Progress Rep., Atlantic Biol. Stat., St. Andrews, N. B., No. 11, 3—5, 1934.
- Hachey, H. B. North Atlantic Cyclones and Coastal Waters. Progress Rep. Atlantic Biol., Stat., St. Andrews, N. B. No. 11, 6—9, 1934.
- Harwood, E. M. and Brooks, C. F. Monthly Sequency of Sea-Surface Temperature on the New York—San Juan Steamship Route. Trans. Amer. Geophys. Union, Fourteenth Ann. Meet., 1933, 173—80, 1933.
- Idrac, P. Recherches sur les mouvements et fluctuations de température des eaux sous-marines en Méditerranée. Ann. Inst. Océanogr. XIV, Fasc. 11, 21—35, Paris, 1934.
- Jacobsen, J. P. and Thomsen, H. Periodical Variations in Temperature and Salinity in the Straits of Gibraltar. James Johnstone Mem. Volume, 275—93, Liverpool, 1934.
- Leps, W. Salzgehalt und Stromverhältnisse in den Binnengewässern des westlichen Rügens. Jahrb. Geogr. Ges. Greifswald (51/52) 1933/34.
- Orr, A. P. and Moorhouse, F. W. The Temperature of the Waters in the Anchorage, Low Isles. Great Barrier Reef Exped. 1928—29, Sci. Rep. II, No. 4, 98—101, Brit. Mus. (Nat. Hist.), London, 1933.
- Schott, G. Die Verteilung des Salzgehaltes im Oberflächenwasser der Ozeane. James Johnstone Mem. Volume, 235—41, Liverpool, 1934.
- Tait, J. B. Surface Drift-Bottle Results in Relation to Temperature, Salinity and Density Distributions in the Northern North Sea. Cons. Perm. Internat. p. l'Explor. de la Mer, Rapp. et Proc.-Verb., LXXXIX, 3ème partie, 69—79, Copenhagen, 1934.
- Van Riel, P. M. Oppervlakttemperatuur in het Noordwestelijk gedeelte van den Atlantischen Oceaan. K. Nederl. Meteor. Inst., No. 102, Meded. en Verhandl. No. 35, 's Gravenhage, 1933. (In Dutch and English).
- Wiese, W. Temperatur und Salzgehalt des Meerwassers. Trans. Arctic Inst., X, 39—97, Leningrad, 1933. (In Russian, German Résumé).
- Wüst, G. Salzgehalt und Wasserbewegung im Suezkanal. Naturwissenschaften, Nr. 26, 1934.
- Wüst, G. Über die Bedeutung von Bodentemperaturmessungen für die Oceanographische, Morphologische, Chemische und Geologische Erforschung der Tiefsee. James Johnstone Mem. Volume, 242—56, Liverpool, 1934.

## HYDROGEN ION-CONCENTRATION AND DISSOLVED GASES

- Kreps, E. Organic Catalysts or Enzymes in Sea Water. James Johnstone Mem. Volume, 193—202, Liverpool, 1934.
- Moberg, E. G., Greenberg, D. M., Revelle, R. and Allen, E. C. The Buffer Mechanism of Sea Water. Bull. Scripps Inst. Oceanogr. La Jolla, Cal., Techn. Ser. III, 231—78, Berkeley, Cal., 1934.
- Nikitine, B. N. et Malm, E. Influence de l'oxygène, des ions hydrogène et de l'acide carbonique sur la distribution verticale du Plankton de la Mer Noire. Ann. Inst. Océanogr. XIV, Fasc. 4, 137—71, Paris, 1934.
- Thompson, T. G., Thomas, B. D. and Barnes, C. A. Distribution of Dissolved Oxygen in the North Pacific Ocean. James Johnstone Mem. Volume, 203—34, Liverpool, 1934.

## PHOSPHATES AND NITRATES

- Honig, C. Nitrates in Aquarium Water. Journ. Mar. Biol. Assoc., U. K., N. S. XIX, 723—25, Plymouth, 1934.
- Robinson, R. J. and Wirth, H. E. Free Ammonia, Albuminoid Nitrogen and Organic Nitrogen in the Waters of the Pacific Ocean off the Coasts of Washington and Vancouver Island. Journ. du Conseil, IX, 187—96, Copenhagen, 1934.
- Strøm, K. M. Phosphatspeicherung in abgeschlossenen Meeresteilen. Internat. Rev. d. ges. Hydrobiol. usw., XXX, 379—80, Leipzig, 1934.

- Waksman, S. A., Hotchkiss, M. and Carey, C. L. Marine Bacteria and their Rôle in the Cycle of Life in the Sea. II. Bacteria concerned in the cycle of nitrogen in the sea. *Biol. Bull., Woods Hole, Mass., LXV*, 137—67, 1933.

#### OTHER CONSTITUENTS

- Rakestraw, N. W. and Lutz, F. B. Arsenic in Sea Water. *Biol. Bull., Woods Hole, Mass., LXV*, 397—401, 1933.
- Robinson, R. J. and Wirth, H. E. Free Ammonia, Albuminoid Nitrogen and Organic Nitrogen in the Waters of the Pacific Ocean off the Coasts of Washington and Vancouver Island. *Journ. du Conseil, IX*, 187—96, Copenhagen, 1934.
- Skopintzew, B. A. Bestimmung von kleinen Jodidmengen in Gegenwart von viel Chloriden und Bromiden. *Zeitschr. f. analyt. Chemie, XCII*, 175—84, München, 1934.

#### Currents.

- Anon. An unsere Beobachter von Stromversetzungen. *Seewart, Nr. 1*, 1934.
- Carruthers, J. N. The Flow of Water Past the Seven Stones Lightvessel. *Journ. Mar. Biol. Assoc., U. K., N. S. XIX*, 921—30, Plymouth, 1934.
- Defant, A. Ergebnisse der Strom- und Wasserstandmessungen im südlichen Kattegat. Veröff. Inst. f. Meereskunde, N. F. A., Heft 25, 9—60, Berlin, 1934.
- Griesel, R. Die Beziehungen zwischen Gezeiten, Strömungen und Salzgehalt in der Trave. *Mitt. Naturhist. Mus., 2. Reihe, H. 37*, Lübeck, 1934.
- Hidaka, K. On the application of Fredholm's integral equations to the numerical computation of drift currents. Convection current of Ekman's type in a given solenoidal field. *Geophys. Mag., VIII*, No. 1, Tokyo, 1934.
- Iselin, C. O'D. The Development of Our Conception of the Gulf Stream System. *Trans. Amer. Geophys. Union, Fourteenth Ann. Meet., 1933*, 226—31, 1933.
- Kisindo, S. Methods of Ocean Current Observations now used by the Hydrographic Department, Tokyo, and some results obtained to date. *Hydrogr. Rev., XI*, No. 1, 81—88, Monaco, 1934.
- Leps, W. Salzgehalts und Stromverhältnisse in den Binnengewässern des westlichen Rügens. *Jahrb. Geogr. Ges. Greifswald (51/52)*, 1933/34.
- Matuzawa. Comparison of movement of water in a V-shaped Bay with that in a U-shaped Bay. *Jap. Journ. Astron. a. Geophys. XI*, No. 2, Tokyo, 1934.
- Nares, J. D. A method of obtaining current observations from a ship in deep water without anchoring. *Hydrogr. Rev. XI*, No. 1, 158—59, Monaco, 1934.
- Römer, E. Beobachtung von Stromversetzungen. *Hansa, Hamburg*, 1934, 13.
- Schlichting, H. Neuere Untersuchungen über die Turbulenzentstehung. *Naturwissenschaften*, 22/24, 1934.
- von Schubert, O. Ergebnisse der ozeanographischen Serienbeobachtungen. Veröff. Inst. f. Meereskunde, N. F. A., Heft 25, 61—144, Berlin, 1934.
- Tait, J. B. Surface Drift-bottle Results in relation to Temperature, Salinity and Density Distributions in the Northern North Sea. *Cons. Perm. Internat. p. l'Explor. de la Mer, Rapp. et Proc.-Verb., LXXXIX*, 3ème partie, 69—79, Copenhagen, 1934.
- Uda, M. Oceanic currents estimated from the records of plying drift-nets and long-lines in fishing. *Bull. Japan. Soc. Sci. Fish., III*, 93—100, Tokyo, 1934. (In Japanese, English Summary).
- Wiese, W. Die Triften des "Sibirjakow" im Tschuktschen Meer. *Trans. Arctic Inst., X*, 103—24, Leningrad, 1933. (In Russian, German Résumé).
- Wüst, G. Anzeichen von Beziehungen zwischen Bodenstrom und Relief in der Tiefsee des Indischen Ozeans. *Naturwissenschaften*, D. 16, 1934.

#### Tides.

- Defant, A. Gedanken über Interne Gezeitenwellen. *James Johnstone Mem. Volume*, 310—15, Liverpool, 1934.
- Gibson, A. H. Tidal Estuaries: Forecasting by Model Experiments. *Nature*, CXXXIII, 969—72, 1934.
- Griesel, R. Die Beziehungen zwischen Gezeiten, Strömungen und Salzgehalt in der Trave. *Mitt. Naturhist. Mus., 2. Reihe, H. 37*, Lübeck, 1934.
- Heck, N. H. Tidal or Seismic Sea Waves. *Field Eng. Bull. Coast and Geodet. Survey, Washington*, June 1934.
- Kjaer, R. and Fjeldstad, J. E. Tidal Observations in the Arctic. *Hydrogr. Rev. XI*, No. 1, 89—94, Monaco, 1934.
- de Leur, G. A. Harmonische Analyse der Watergetijden. *De Zee, Nr. 8*, 1934.
- Pettersson, O. La Marée Interne. *James Johnstone Mem. Volume*, 294—309, Liverpool, 1934.
- Proudman, J. On the Distribution of Tides over an Element of the Sea. *James Johnstone Mem. Volume*, 316—23, Liverpool, 1934.

- Roberts, E. B. The Roberts Offshore Tide Gage. Field Eng. Bull. Coast and Geodet. Survey, Washington, June 1934.
- Springhubbe, H. Gezeiten-Erscheinungen im St. Lorenz-Golf. Arch. Deutsch. Seewarte, LIII, Nr. 2, Hamburg, 1934.
- Whitney, P. C. Some Notes on Tide Observations. Field Eng. Bull. Coast and Geodet. Survey, Washington, June 1934.
- Zeilon, N. Experiments on Boundary Tides. A Preliminary Report. Göteborgs Kungl. Vetenskaps- och Vitterhets-Samhälles Handlingar, Fem. Följd., Ser. B, III, No. 10, Göteborg, 1934.

#### LIGHT, COLOUR AND TRANSPARENCY

- Burr, G. O. and M. M. A rapid survey instrument for measurement of light intensity under water. Ecology, XV, 326—28, Brooklyn, N. Y., 1934.
- Clarke, G. L. Observations on the Penetration of Daylight into Mid-Atlantic and Coastal Waters. Biol. Bull., Woods Hole, Mass., LXV, 317—37, 1933.
- Ellis, M. M. A Photoelectric Apparatus for Turbidity and Light Penetration Measurement. Science, LXXX, 37, New York, 1934.
- Linsler, H. Lichtabsorptionsmessungen an natürlichen und Gebrauchswässern. Österreich. Bot. Zeitschr. LXXXI, 31—46, 1932.
- Pettersson, H. A Transparency-Meter for Sea-Water. Göteborgs Kungl. Vetenskaps- och Vitterhets-Samhälles Handlingar, Fem. Följd., Ser. B, III, No. 8, Göteborg 1934.
- Pettersson, H. Scattering and Extinction of Light in Sea-Water. Göteborgs Kungl. Vetenskaps- och Vitterhets-Samhälles Handlingar, Fem. Följd., Ser. B, IV, No. 4, Göteborg, 1934.
- Pettersson, H., Höglund, H. and Landberg, S. Submarine Daylight and the Photosynthesis of Phytoplankton. Göteborgs Kungl. Vetenskaps- och Vitterhets-Samhälles Handlingar, Fem. Följd., Ser. B, IV, No. 5, Göteborg, 1934.
- Poole, H. H. and Atkins, W. R. G. The Use of a Selenium Rectifier Photoelectric Cell for Submarine Photometry. Journ. Mar. Biol. Assoc., U. K., N. S. XIX, 727—36, Plymouth, 1934.
- Utterback, C. L. and Jørgensen, W. Absorption of Daylight in the North Pacific Ocean. Journ. du Conseil, IX, 197—210, Copenhagen, 1934.
- VerCELLI, F. Sulla Propagazione delle Radiazioni Solari Attraverso l'Acqua. James Johnstone Mem. Volume, 340—48, Liverpool, 1934.

#### Oceanography-Miscellaneous.

- Twenhofel. Relation of Geology to Oceanography. Scientific Monthly, New York, May 1932.

#### Plankton.

- Aikawa, H. On the quantitative analysis of plankton associations in the seas surrounding Japan. Journ. Imp. Fish. Exper. Stat., No. 5, 237—72, Tokyo, 1934. (In Japanese, English Résumé).
- Allen, W. E. Marine Plankton Diatoms of Lower California in 1931. Botanical Gaz., XCV, 485—92, U. S. A., 1934.
- Allen, W. E. The Primary Food Supply of the Sea. Quart. Rev. Biol., IX, No. 2, 161—80, Baltimore, 1934.
- Bernstein, T. Zooplankton des nördlichen Teiles des Karischen Meeres. Trans. Arctic Inst., IX, 3—58, Leningrad, 1934. (In Russian, German Résumé).
- Bogorov, B. G. Seasonal Changes in Biomass of *Calanus finmarchicus* in the Plymouth Area in 1930. Journ. Mar. Biol., Assoc., U. K., N. S. XIX, 585—612, Plymouth, 1934.
- Bollmann, A. Die Chatognäthen der Deutschen Antarktischen Expedition auf der "Deutschland" 1911/12. Internat. Rev. d. ges. Hydrobiol. usw., XXX, 251—305, Leipzig, 1934.
- Clarke, G. L. Diurnal Migration of Plankton in the Gulf of Maine and its Correlation with Changes in Submarine Irradiation. Biol. Bull., Woods Hole, Mass., LXV, 402—36, 1933.
- Cooper, L. H. N. The Variation of Excess Base with Depth in the English Channel with reference to the Seasonal Consumption of Calcium by Plankton. Journ. Mar. Biol. Assoc., U. K., N. S. XIX, 747—54, Plymouth, 1934.
- Cooper, L. H. N. The Determination of Phosphorus and Nitrogen in Plankton. Journ. Mar. Biol. Assoc., U. K., N. S. XIX, 755—59, Plymouth, 1934.
- Cupp, E. E. Quantitative studies of miscellaneous series of surface catches of marine diatoms and dinoflagellates taken between Seattle and the Canal Zone from 1924 to 1928. Trans. Amer. Microscop. Soc. XL, 238—45, 1930.

- Cupp, E. E. Analysis of Marine Plankton Diatom collections taken from the Canal Zone to California during March, 1933. *Trans. Amer. Microscop. Soc.*, LIII, No. 1, 22—29, Lancaster Pa., 1934.
- Dakin, W. J. The Plankton Calendar of the Continental Shelf of the Pacific Coast of Australia at Sydney compared with that of the Irish Sea. *James Johnstone Mem. Volume*, 164—75, Liverpool, 1934.
- Davidson, V. M. Fluctuations in the abundance of planktonic diatoms in the Passamaquoddy region, New Brunswick, from 1924 to 1931. *Contrib. Canad. Biol. and Fish.*, N. S. VIII, 357—407, Toronto, 1934.
- Eddy, S. A Study of Fresh-water Plankton Communities. *Illinois Biol. Monographs*, XII, No. 4, Urbana, 1934.
- Fage, L. La phase pélagique des Ostracodes benthiques littoraux. *Ann. Sci. Nat., Zool., Xe Sér.*, XVII, 249—61, Paris, 1934.
- Foxon, G. E. H. Notes on the Swimming Methods and Habits of Certain Crustacean Larvae. *Journ. Mar. Biol. Assoc., U. K., N. S. XIX*, 829—49, Plymouth, 1934.
- Foxon, G. E. H. Phototropism in *Porcellana* Larvae. *Nature*, CXXXIV, 104, 1934.
- Frost, W. E. The Occurrence and Development of *Euphausia krohnii* off the South-West Coast of Ireland. *Proc. Roy. Irish Acad.*, XLII, Section B, No. 3, Dublin, 1934.
- Gardiner, A. C. Variations in the Amount of Macroplankton by Day and Night. *Journ. Mar. Biol. Assoc., U. K., N. S. XIX*, 559—67, Plymouth, 1934.
- Garnjobst, L. Studies on *Stylonethes sterkii* sp. nov. I., Morphology and systematic position. *Journ. Mar. Biol. Assoc., U. K., N. S. XIX*, 707—22, Plymouth, 1934.
- Gemeinhart, K. Biologische Sonderuntersuchungen. Lief. 3. Die Silicoflagellaten des Südatlantischen Ozeans. *Wiss. Ergebn. deutsch. Atlant. Exped. a. d. Forschung. Vermessungsschiff "Meteor"*, 1925—1927, XII, Teil 1, 274—312, Berlin und Leipzig, 1934.
- Gurney, R. The development of *Rhincalanus*. *Discovery Rep.*, IX, 207—14, Cambridge, 1934.
- Hardy, A. C. The Plankton Indicator. Experiments, Tests and now ready for general use. *Fish Trades Gaz.*, 18—19, 12—V—34.
- Harvey, H. W. Measurement of Phytoplankton Population. *Journ. Mar. Biol. Assoc., U. K., N. S. XIX*, 761—73, Plymouth, 1934.
- Harvey, H. W. Annual Variation of Planktonic Vegetation 1933. *Journ. Mar. Biol. Assoc., U. K., N. S. XIX*, 775—92, Plymouth, 1934.
- Hentschel, E. Eine Methode zur Untersuchung von Copepodenbevölkerungen. *Cons. Perm. Internat. p. l'Explor. de la Mer, Rapp. et Proc.-Verb.*, LXXXIX, 3ème partie, 93—97, Copenhagen, 1934.
- Joubin, L. Caractères généraux du plancton. *Bull. Soc. d'Océanogr. de France*, XIV, 1345—54, 1934.
- Kahl, A. Ciliata entocommensalia et parasitica. *Tierwelt der Nord- und Ostsee (Grimpe und Wagler)*, Teil II. ca. Leipzig, 1934.
- Kramp, P. L. An exceptional Occurrence of *Rhizostoma octopus* and *Chrysaora hysoscella* in the Danish Waters in 1933. *Journ. du Conseil*, IX, 211—21, Copenhagen, 1934.
- Krizenecky, J. a Krepelka, M. Pokus o kvantitativni stanoveni rybnicniho planktonu pomoci centrifugi. *Vestnik Cesko-slovenske Akad. Zem.* VIII, 506—10, 1932.
- Marshall, S. M. The Production of Microplankton in the Great Barrier Reef Region. *Great Barrier Reef Exped. 1928—29, Sci. Rep. II*, No. 5, *Brit. Mus. (Nat. Hist.)*, London, 1933.
- Marshall, S. M., Nicholls, A. G. and Orr, A. P. On the Biology of *Calanus finmarchicus*. V. Seasonal Distribution, Size, Weight and Chemical Composition in Loch Striven in 1933, and their Relation to the Phytoplankton. *Journ. Mar. Biol. Assoc., U. K., N. S. XIX*, 793—827, Plymouth, 1934.
- Nielsen, E. S. und Brand, T. v. Quantitative Zentrifugenmethoden zur Planktonbestimmung. *Cons. Perm. Internat. p. l'Explor. de la Mer, Rapp. et Proc.-Verb.*, LXXXIX, 3ème partie, 99—100, Copenhagen, 1934.
- Nikitine, B. N. et Malm, E. Influence de l'oxygène, des ions hydrogène et de l'acide carbonique sur la distribution verticale du Plankton de la Mer Noire. *Ann. Inst. Océanogr.*, XIV, Fasc. 4, 137—71, Paris, 1934.
- Ogilvie, H. S. A Preliminary Account of the Food of the Herring in the North-Western North Sea. *Cons. Perm. Internat. p. l'Explor. de la Mer, Rapp. et Proc.-Verb.*, LXXXIX, 3ème partie, 85—92, Copenhagen, 1934.
- Orr, A. P. On the Biology of *Calanus finmarchicus*. Part IV. Seasonal Changes in the Weight and Chemical Composition in Loch Fyne. *Journ. Mar. Biol. Assoc., U. K., N. S. XIX*, 613—32, Plymouth, 1934.

- Pearsall, W. H. Phytoplankton in the English Lakes. II. The composition of the phytoplankton in relation to dissolved substances. *Journ. Ecology*, XX, 241—62, 1932.
- Pettersson, H., Höglund, H. and Landberg, S. Submarine Daylight and the Photosynthesis of Phytoplankton. Göteborgs Kungl. Vetenskaps- och Vitterhets-Samhälles Handlingar, Fem. Föjd., Ser. B, IV, No. 5, Göteborg, 1934.
- Redfield, A. C. On the Proportions of Organic Derivatives in Sea Water and their Relation to the Composition of Plankton. James Johnstone Mem. Volume, 176—92. Liverpool, 1934.
- Russell, F. S. On the Occurrence of the Siphonophores *Muggiaea atlantica* Cunningham and *Muggiaea kochi* (Will) in the English Channel. *Journ. Mar. Biol. Assoc., U. K., N. S. XIX*, 555—58, Plymouth, 1934.
- Russell, F. S. The Vertical Distribution of Marine Macroplankton. XII. Some Observations on the Vertical Distribution of *Calanus finmarchicus* in Relation to Light Intensity. *Journ. Mar. Biol. Assoc., U. K., N. S. XIX*, 569—84, Plymouth, 1934.
- Stanbury, F. A. The Replacement of Potassium by Rubidium in *Nitzschia closterium*. *Journ. Mar. Biol. Assoc., U. K., N. S. XIX*, 931—39, Plymouth, 1934.
- Tattersall, W. M. and Sheppard, E. M. Observations on the Bipinnaria of the Asteroid Genus *Luidia*. James Johnstone Mem. Volume, 35—61, Liverpool, 1934.
- Thiemann, K. Biologische Sonderuntersuchungen. Lief. 3. Das Plankton der Flussmündungen. *Wiss. Ergebn. deutsch. Atlant. Exped. a. d. Forsch- u. Vermessungsschiff "Meteor"*, 1925—1927, XII, Teil 1, 199—273, Berlin und Leipzig, 1934.
- Torelli, B. Eufausiacei del Mar Rosso raccolti dal Prof. L. Sanzo nella Campagna della R. N. Ammiraglio Magnaghi, 1923—1924 (Memoria XIV. della campagna). *R. Com. Talassogr. Ital., Mem. CCVIII*, Venezia, 1934.

#### Marine Bacteria.

- Pohl, L. Sur un nouveau moyen de destruction de micro-organismes marins nocifs. *Bull. Soc. d'Océanogr. de France*, XIV, 1390—91, Paris, 1934.
- Reuszer, H. W. Marine Bacteria and their Rôle in the Cycle of Life in the Sea. III. The Distribution of Bacteria in the Ocean Waters and Muds about Cape Cod. *Biol. Bull., Woods Hole, Mass., LXV*, 480—97, 1933.
- Waksman, S. A. and Carey, C. L. Rôle of Bacteria in Decomposition of Plant and Animal Residues in the Ocean. *Proc. Soc. Exper. Biol. and Med.*, XXX, 526—27, New York, 1933.
- Waksman, S. A., Carey, C. L. and Reuszer, H. W. Marine Bacteria and their Rôle in the Cycle of Life in the Sea. I. Decomposition of marine plant and animal residues by bacteria. *Biol. Bull., Woods Hole, Mass., LXV*, 57—79, 1933.
- Waksman, S. A., Hotchkiss, M. and Carey, C. L. Marine Bacteria and their Rôle in the Cycle of Life in the Sea. II. Bacteria concerned in the Cycle of Nitrogen in the Sea. *Biol. Bull., Woods Hole, Mass., LXV*, 137—67, 1933.

#### Marine Plants.

- Brunelli, G. Le caratteristiche biologiche dell'ambiente lagunare e degli stagni salmastri. *Boll. Pesca, Piscicoltura e Idrobiologia*, X, 18—28, Roma, 1934.
- Butcher, R. W. Notes on the Variation of the British Species of *Zostera*. *Rep. Botanical Exchange Club for 1933*, X, 592—97, 1934.
- Carmin, J. Algae of Palestinian Shores. *Bull. Inst. Océanogr. No. 653*, Monaco, 1934.
- Dillon, T. and O'Tuama, T. Chemistry of the Red and Brown Algae. *Nature*, CXXXIII, 837, 1934.
- Kitching, J. A., Macan, T. T. and Gilson, H. C. Studies in Sublittoral Ecology. I. A Submarine Gully in Wembury Bay, South Devon. *Journ. Mar. Biol. Assoc., U. K., N. S. XIX*, 677—705, Plymouth, 1934.
- Kolkwitz, R. Tropische Algenbestände und ihre Entwicklungsbedingungen. *Ber. Deutsch. Bot. Ges. L*, 59—67, 1932.
- Montfort, C. The Relation between Colour and Light Absorption in Red and Green Sea Algae. *Biochem. Zeitschr.*, CCLXI, 179, Berlin, 1933.
- Okamura, K. On Gelidium and Pterocladia of Japan. *Journ. Imp. Fish. Inst.*, XXIX, 47—67, Tokyo, 1934.
- Petersen, H. E. Wasting Disease of Eelgrass (*Zostera marina*). *Nature*, CXXXIV, 143—44, 1934.
- Prenant, M. Modifications récentes de flore et de faune marines dans le Morbihan et la baie de Quiberon. *Bull. Inst. Océanogr. No. 648*, Monaco, 1934.

- Van der Weij, H. G. Über das Vorkommen von Wuchsstoff bei Meeressalgen. *Pubbl. Staz. Zool. di Napoli*, XIII, 172—79, Roma, 1933.
- Yonge, C. M. Origin and nature of the association between invertebrates and unicellular algae. *Nature*, CXXXIV, 12—15, 1934.

### Bottom Deposits.

- Alexander, A. E. A petrographic and petrologic study of some continental sediments. *Journ. Sedimentary Petrol.*, IV, No. 1, 12—22, 1934.
- Matthews, L. H. The Marine Deposits of the Patagonian Continental Shelf. *Discovery Rep.*, IX, 175—206, Cambridge, 1934.
- Orton, J. H. Air-pockets in shore sands and winter packing of the sea-bottom. *Nature*, CXXXIII, 835—36, 1934.
- Waksman, S. A. On the Distribution of Organic Matter in the Sea Bottom and the Chemical Nature and Origin of Marine Humus. *Soil Sci.*, XXXVI, 125—147, 1933.

### Bottom Fauna.

#### GENERAL.

- Brunelli, G. Le caratteristiche biologiche dell'ambiente lagunare e degli stagni salmastri. *Boll. Pesca, Piscicoltura e Idrobiol.*, X, 18—28, Roma, 1934.
- Cronk, M. W. The bottom fauna of Shakespeare Island Lake, Ontario. *Univ. Toronto Studies, Biol. Ser.* XXXVI, 31—65, 1932.
- Idelson, M. S. Materials for the quantitative evaluation of the bottom fauna of the Barents, White and Kara Seas. No. 7. Distribution of the benthos biomass in the Southern Barents Sea. The influence of different factors on the density of the sea bottom population. *Trans. Oceanogr. Inst.*, III, No. 4, 63—72, Moscow, 1934. (In Russian, English Summary).
- Kitching, J. A., Macan, T. T. and Gilson, H. C. Studies in Sublittoral Ecology. I. A Submarine Gully in Wembury Bay, South Devon. *Journ. Mar. Biol. Assoc., U. K.*, N. S. XIX, 677—705, Plymouth, 1934.
- Pérez, C. Notes sur les Epicarides et les Rhizocéphales des côtes de France. *Arch. Zool. Expér. et Gén.*, LXXV, Fasc. 32, Paris, 1934.
- Prenant, M. Modifications récentes de flore et de faune marines dans le Morbihan et la baie de Quiberon. *Bull. Inst. Océanogr.* No. 648, Monaco, 1934.

#### PHYSIOLOGY AND BEHAVIOUR

- Barrois, J. Le développement échinodermien dans ses rapports avec la genèse des Vertébrés. *Ann. Sci. Nat., Zool.*, Xe Sér., XVII, 333—45, Paris, 1934.
- Califano, L. Ricerche sulla genesi della melanina. *Pubbl. Staz. Zool. di Napoli*, XIII, 289—302, Roma, 1933.
- Coe, W. R. Sexual Rhythm in the Pelecypod Mollusk *Teredo*. *Science*, LXXX, 192, 1934.
- Daniel, R. J. Comparative Study of the Abdominal Musculature in Malacostraca. Part III. Rep. for 1932 (No. 41) *Lancs. Sea Fish. Lab.*, 71—132, Liverpool, 1933.
- Dawes, B. and Huxley, J. S. Rapid Growth-Rate and Diminishing Heterogony. *Nature*, CXXXIII, 982—83, 1934.
- Flörkin, M. Recherches sur les Hémérythrine. *Arch. Internat. Physiol.* XXXVI, 247—328, Liège et Paris, 1933.
- Fox, H. M. Blood Circulation of Animals possessing Chlorocruorin. *Proc. Roy. Soc., Ser. B*, CXII, 479—95, London, 1933.
- Graham, A. The Cruciform Muscle of Lamellibranchs. *Proc. Roy. Soc. Edinburgh*, LIV, 17—30, 1934.
- Koyama, M. Studien über den Cholesterinstoffwechsel in tierischen Organismus. VIII. Morphologisches Studium der Fette bei Crustacea. *Trans. Japan. Path. Soc.* XIX, 364—66, 1929.
- Lwoff, A. et M. L'Appareil parabasal des Flagellés, à propos du mémoire de MM. O. Duboscq et Grassé. *Arch. Zool. Expér. et Gén.*, LXXVI, Notes et Revue, No. 2, 56—62, Paris, 1934.
- Marks, G. W. The inactivation of Catalases from certain marine animals by oxygen. *Journ. Biol. Chem.*, CV, 489—500, Baltimore, 1934.
- Raffy, A. Recherches physiologiques sur la respiration de la Thelphuse. Comparaison avec l'Ecrevisse. *Bull. Inst. Océanogr.* No. 649, Monaco, 1934.
- Redfield, A. C. and Ingalls, E. N. The Oxygen Dissociation Curves of some Bloods containing Hemocyanin. *Journ. Cell. and Comp. Physiol.*, III, 169—202, 1933.



- Sandon, H. Pseudopodial Movements of Foraminifera. *Nature*, CXXXIII, 761—62, 1934.
- Stephenson, E. M. Control of Chromatophores in *Leander serratus*. *Nature*, CXXXIII, 912—13, 1934.
- Welsh, J. H. Light Intensity and the Extent of Activity of Locomotor Muscles as opposed to Cilia. *Biol. Bull.*, Woods Hole, Mass., LXV, 168—74, 1933.
- Welsh, J. H. Photic stimulation and rhythmical contractions of the mantle flaps of a lamellibranch. *Proc. Nat. Acad. Sci. U. S. A.* XIX, 755—57, Washington, 1933.
- Willstaedt, H. Über den roten Farbstoff der Hummerschalen. *Biochem. Zeitschr.* CCLVIII, 301—03, Berlin, 1933.

## SPECIAL GROUPS

- Adam, W. Note sur les Céphalopodes. III. Les Céphalopodes du Sud de la Mer du Nord. *Bull. Mus. Roy. d'Hist. Nat. de Belgique*, IX, No. 46, Bruxelles, 1933.
- Allgén, C. Über einige freilebende Nematoden von der Südküste Schwedens. *Folia Zool. et Hydrobiol.* V, 290—305, Riga, 1934.
- Alpers, F. Beitrag zur Kenntnis der Lebensweise von *Murex*. *Pubbl. Staz. Zool. di Napoli*, XIII, 165—171, Roma, 1933.
- Annenkova, N. Kurze Übersicht der Polychaeten der Litoralzone der Bering-Insel (Kommandor-Inseln), nebst Beschreibung neuer Arten. *Zool. Anz.*, CVI, 322—33, Leipzig, 1934.
- Anon. The Mitten or Chinese Crab (*Eriocheir sinensis* H. Milne-Edwards). *Min. Agric. and Fish.*, Fish. Notice No. 22, London, 1934.
- Atkins, D. Two Parasites of the Common Cockle *Cardium edule*, a Rhabdocoele *Paravortex cardii* Hallez and a Copepod, *Paranthesius rostratus* (Canu). *Journ. Mar. Biol. Assoc. U. K.*, N. S. XIX, 669—76, Plymouth, 1934.
- Brambell, F. W. R. and Cole, H. A. Occurrence of an Enteropneust in Wales. *Nature*, CXXXIII, 913, 1934.
- von Buddenbrock, W. Beobachtungen über nesselnde Tintenfische. *Biol. Zentralbl.* LIV, 284—87, Leipzig, 1934.
- De Coninck, L. A. and Stekhoven, J. H. S. The Freelifving Marine Nemas of the Belgian Coast. II. with general remarks on the structure and the system of Nemas. *Mém. Mus. Roy. d'Hist. Nat. de Belgique*, No. 58, Bruxelles, 1933.
- Day, J. H. Development of *Scolecopsis fuliginosa* (Claparède). *Journ. Mar. Biol. Assoc. U. K.*, N. S. XIX, 633—54, Plymouth, 1934.
- Day, J. H. and Wilson, D. P. On the Relationship of the Substratum to the Metamorphosis of *Scolecopsis fuliginosa* (Claparède). *Journ. Mar. Biol. Assoc.*, U. K., N. S. XIX, 655—62, Plymouth, 1934.
- Demel, K. et Dluski, S. Compte-Rendu d'une excursion scientifique sur le banc central de la Baltique. *Arch. Hydrobiol. et d'Ichthyol.*, VIII, 48—74, Suwalki, 1934. (In Polish, French Résumé).
- Elmhirst, R. Enteropneusts in the Clyde Sea-Area. *Nature*, CXXXIV, 183, 1934.
- Engel, H. The English Species of the Family *Pleurobranchidae*. *Ann. and Mag. Nat. Hist.*, Ser. 10, XIII, 583—89, London, 1934.
- Engel, H. Über Echinodermen aus der Nordsee und dem Nordatlantik. *Zool. Anz.*, CVII, 23—30, 1934.
- Fauvel, P. Sur les caractères spécifiques des Syllidiens. *Ann. Sci. Nat., Zool.*, Xe Sér., XVII, 263—71, Paris, 1934.
- Fischer-Piette, E. Remarques de systématique et de biogéographie sur les Patelles des côtes françaises. *Bull. Mus. Nation. d'Hist. Nat.*, 2e Sér., VI, 280—85, Paris, 1934.
- De Francesco, C. Sulla velocità di sviluppo negli incroci degli Echinodermi. *Pubbl. Staz. Zool. di Napoli*, XIII, 279—88, 1933.
- Gorbunow, G. P. Die Dekapoden-Crustaceen der nördlichen Hälfte des Karischen Meeres. *Trans. Arctic Inst.*, IX, 59—77, Leningrad, 1934. (In Russian, German Résumé).
- Gravier, C. et Dantan, J. L. Annélides polychètes recueillies au cours de Pêches nocturnes à la lumière sur les côtes d'Annam. *Ann. Inst. Océanogr.* XIV, 37—136, Paris, 1934.
- Kahl, A. Suctorina. Tierwelt der Nord- und Ostsee (Grimpe und Wagler), Teil II. cs, Leipzig, 1934.
- Kühl, H. Die Fortbewegung der Schwimmkrabben mit Bezug auf die Plastizität des Nervensystems. *Zeitschr. f. vergleich. Physiol.* XIX, 489—521, 1933. *Trav. Stat. Biol. Marit. de Lisbonne*, No. 34, 1933.
- Lebour, M. V. The Eggs and Larvae of some British Turridae. *Journ. Mar. Biol. Assoc. U. K.*, N. S. XIX, 541—54, Plymouth, 1934.

- Leloup, E. Contribution à la connaissance des Hydropolypes de la Côte des Pays-Bas. Bull. Mus. Roy. d'Hist. Nat. de Belgique, IX, No. 45, Bruxelles, 1933.
- Mathias, P. Sur la biologie de l'*Artemia salina* L. (Crustacé phyllopede). Ann. Sci. Nat., Zool., Xe Sér., XVII, 433—39, Paris, 1934.
- Moore, H. B. The Biology of *Balanus balanoides*. I. Growth Rate and its Relation to Size, Season and Tidal Level. Journ. Mar. Biol. Assoc. U. K., N. S. XIX, 851—68, 1934.
- Moore, H. B. A Comparison of the Biology of *Echinus esculentus* in Different Habitats. Part I. Journ. Mar. Biol. Assoc. U. K., N. S. XIX, 869—85, 1934.
- Moore, H. B. The Rate of Growth of *Balanus*. Scottish Naturalist, No. 208, 101—09, 1934.
- Odhner, N. H. The Nudibranchiata. Brit. Antarctic ("Terra Nova") Exped., 1910, (Zool.), VII, No. 5, Brit. Mus. (Nat. Hist.) London, 1934.
- Pax, F. Anthozoa (Teil I: Allgemeines, *Ceriantharia*, *Antipatharia*, *Zoantharia*, *Madreporaria*). Tierwelt der Nord- und Ostsee (Grimpe und Wagler), Teil III. e1, Leipzig, 1934.
- Pirlot, J. M. La Ponte de l'*Arenicola marina* Linné à la côte Belge. Bull. Mus. Roy. d'Hist. Nat. de Belgique, IX, No. 49, Bruxelles, 1933.
- Rawlinson, R. A Comparative Study of *Metridium senile* (L.) var. *dianthus* (Ellis) and a Dwarf Variety of this Species occurring in the River Mersey, with a Discussion on the Systematic Position of the Genus *Metridium*. Journ. Mar. Biol. Assoc. U. K., N. S. XIX, 901—19, 1934.
- Ritchie, A. D. The Habitat of *Procerodes ulvae*. Journ. Mar. Biol. Assoc. U. K., N. S. XIX, 663—68, 1934.
- Sprehn, C. Cestoidea. Tierwelt der Nord- und Ostsee (Grimpe und Wagler), Teil IV. c2, Leipzig, 1934.
- Stechow, E. Vorkommen eines nordischen Hydroiden, *Corymorpha sarsi* Steenstrup, im Schwarzen Meer. Zool. Anz., CVII, 197—98, 1934.
- Stephen, A. C. The Echiuridae, Sipunculidae, and Priapulidae of Scottish and Adjacent Waters. Proc. Roy. Phys. Soc., XXII, 159—85, 1934.
- Timon-David, J. Recherches sur les Trématodes parasites des Oursins en Méditerranée. Bull. Inst. Océanogr. No. 652, Monaco, 1934.
- Topsent, E. Eponges observées dans les parages de Monaco. (Première partie). Bull. Inst. Océanogr. No. 650, Monaco, 1934.
- Uyemura, M. Über einiger neue Ciliaten aus dem Darmkanal von Japanischen Echinoideen. Sci. Rep. Tokyo Bunrika Daigaku, Section B, Vol. I, 181—91, Tokyo, 1934.
- Wagin, W. L. Hydroidea im Sommer 1931 während der Expedition auf dem Eisbrecher "Lomonossow" im Karischen und im Barents-Meer gesammelt. Trans. Arctic Inst., IX, 79—87, Leningrad, 1934. (In Russian, German Résumé).

### Fishery Investigations.

#### GENERAL.

- Anon. Laboratoire de Lorient. Pêche Marit., Pêche Fluviale et Piscicult., XVII, 269—70, Paris, 1934.
- Buchanan-Wollaston, H. J. The Theory of Variation, Correlation and Regression. Its Relevance in Researches on Proportional Growth. Cons. Perm. Internat. p. l'Explor. de la Mer, Rapp. et Proc.-Verb., LXXXIX, 3ème partie, 33—44, Copenhagen, 1934.
- Buchanan-Wollaston, H. J. On Methods for Fitting Curves to Observations, with Details of Some New Methods. James Johnstone Mem. Volume, 324—39, Liverpool, 1934.
- Bückmann, A. Die angewandte Meeresforschung an der Biologischen Anstalt. a) Fischereiforschung. Der Biologe, III, 179—80, München, 1934.
- Le Danois, E. Rapport sur le fonctionnement de l'Office des Pêches Maritimes pendant l'année 1933. Rev. Trav., Office des Pêches Marit., VII, 9—25, Paris.
- Le Danois, E. Au cours de la seconde croisière, de mai à juillet 1934, le navire "President-Théodore-Tissier" a découvert un nouveau fond de pêche. Pêche Marit., Pêche Fluviale et Piscicult., XVII, 297—99, 1934.
- Ege, V. Johannes Schmidt, 1877—1933. C. R. du Laboratoire Carlsberg, XX, No. 1, 1934.
- Erdmann, W. Die angewandte Meeresforschung an der Biologischen Anstalt. b) Züchtung von Meerestieren. Der Biologe, III, 180—82, München, 1934.
- International Council. Rapport Administratif (1933—1934). Cons. Perm. Internat. p. l'Explor. de la Mer, Rapp. et Proc.-Verb., LXXXIX, 2ème partie, Copenhagen, 1934.
- Lundbeck, J. Fischereibiologisches über die Deutsche Dampferfischerei an der norwegischen Küste. Fischmarkt, N. F. II. 200—03, 1934.

- Ottestad, P. Letter to the Editor. Journ. du Conseil, IX, 249—53, Copenhagen, 1934.
- Pearson, J. C. Marking Fish. Louisiana Conservation Rev., IV, No. 2, 30—33, April 1934.
- Russell, E. S. Size Limits and Mesh Regulations for Sea Fish. Cons. Perm. Internat. p. l'Explor. de la Mer, Rapp. et Proc.-Verb., XC, 1—5, Copenhagen, 1934. Appendix A: Summary of existing Regulations (1933) regarding Size Limits and Mesh Restrictions for Fish taken in the Sea or in Brackish Water (Revised to May, 1934). Cons. Perm. Internat. p. l'Explor. de la Mer, Rapp. et Proc.-Verb., XC, 6—13, Copenhagen, 1934.
- Takayama, I, Ikeda, N. and Andô, S. A study of the "Katsuw" (*Katsuwonus pelamis*) fishing in 1930. Journ. Imp. Fish. Exper. Stat., No. 5, 23—56, Tokyo, 1934. (In Japanese, English Résumé).
- Wohlenberg, E. Die angewandte Meeresforschung an der Biologischen Anstalt. c) Biologische Landgewinnungsarbeiten im Wattenmeer. Der Biologe, III, 182—83, München, 1934.

## COMMERCIAL FISHERIES.

- Anon. Le procédé Bellefont-Folliot de réfrigération du poisson. Pêche Marit., Pêche Fluviale et Piscicult., XVII, 207—09, 1934.
- Anon. L'industrie de la conserve de sardines en France et à l'étranger. Pêche Marit., Pêche Fluviale et Piscicult., XVII, 265—67, 1934.
- Behre, A. Handelsbezeichnungen von Fischen und Fischzubereitungen. Fischmarkt, N. F. II, 120—23, 1934.
- Le Breton. — La Pêche au Maroc, en constante progression, est appelée à un remarquable développement. Pêche Marit., Pêche Fluviale et Piscicult., XVII, 256—57, 1934.
- Depott, G. Omologazione delle voci dei mercati del pesce di Malta e Gozo. Boll. Pesca, Piscicult. e Idrobiol., X, 243—50, Roma, 1934.
- Eichelbaum, E. Die Wirkung der Förderungsmassnahmen der Reichsregierung für die Fischerei. Mitt. Deutsch. Seefisch.-Ver., XXXIX, 230—33, 1934.
- England. Report on Sea Fisheries for the Year 1933. Min. Agric. and Fish., London, 1934.
- Hessle, C. Die Schwedische Ostseefischerei. Handb. Seefisch. Nordeuropas (Lübbert u. Ehrenbaum), VIII, Heft 3b, Stuttgart, 1934.
- Hile, R. and Duden, W. R. Methods for the Investigation of the Statistics of the Commercial Fisheries of the Great Lakes. Trans. Amer. Fish. Soc., Vol. 63, Washington, 1933.
- Lombardi, D. Nota su alcune pesche profonde dello Ionio. Boll. Pesca, Piscicult. e Idrobiol., X, 211—14, Roma, 1934.
- Ninni, E. Pesci stranieri che compariscono sui mercati di Venezia. Boll. Pesca, Piscicult. e Idrobiol., X, 69—76, Roma, 1934.
- Peters, N. Vom Vogelreichtum der Niederelbe und seinen Beziehungen zu den Abwässern Gross-Hamburgs. Fischmarkt, N. F. II, 172—75, 1934.
- Quibbon. Territorial waters. Fish Trades Gaz., 20, 21-VII-34.
- Rosén, N. Sveriges in- och utförsel af fiskvaror år 1933. Ny Svensk Fiskeritidskr., Nr. 16, 181—85, 1934.
- Schnakenbeck, W. Die biologischen Grundlagen für die Fischerei in der Niederelbe. 3. Die zeitlichen Schwankungen in der Fangmengen. Fischmarkt, N. F. II, 148—51, 1934.
- Scordia, C. La pesca del Pesce spada nello Stretto di Messina nel quinquennio 1929—1933. Boll. dell'Ist. Zool. della R. Univ. di Messina, N. 9, Messina, 1933.
- Scotland. Sea Fisheries Statistical Tables, 1933. Fish. Board for Scotland, Edinburgh, 1934.
- Scotland. Fifty-second Annual Report of the Fishery Board for Scotland being for the year 1933. Edinburgh, 1934.

## FISHING GEAR.

- Andersson, K. A. Experiments with Trawls having Different Meshes in the Cod-End. Cons. Perm. Internat. p. l'Explor. de la Mer, Rapp. et Proc.-Verb., XC, 59—61, Copenhagen, 1934.
- Barillon, M. Deuxième note sur les fils et filets. — Rapprochement entre les essais de résistance de fils et les essais de résistance de filets. Rev. Trav. Office des Pêches Marit., VII, 87—98, Paris, 1934.
- Clark, R. S. Scottish Seine Net Investigations. Cons. Perm. Internat. p. l'Explor. de la Mer, Rapp. et Proc.-Verb., XC, 49—57, Copenhagen, 1934.
- Conn, W. T. Getting the most out of yours nets. Fishing Mag., New York, March 1934.

- Davis, F. M. Size Limits and Mesh Regulations for Sea Fish. Appendix B: Report on the Results of Experiments with Savings Gear. Appendix C: A Mesh Experiment Indicating that Small Fish Escape while the Trawl is being towed. Appendix D: Preliminary Note on a Commercial Mesh Experiment. Cons. Perm. Internat. p. l'Explor. de la Mer, Rapp. et Proc.-Verb., XC, 14—31, Copenhagen, 1934.
- Harcourt, H. G. What mesh should be used? Our tests on the BS. 99. Fish Trades Gaz., 26, 25-VIII-34.
- Hessle, C. Die Schwedische Ostseefischerei. Handb. Seefisch. Nordeuropas (Lübbert u. Ehrenbaum), VIII, Heft 3b, Stuttgart, 1934.
- Iversen, T. Some Remarks on Mesh Width and its Influence on Young Fish (with Addendum). Cons. Perm. Internat. p. l'Explor. de la Mer, Rapp. et Proc.-Verb., XC, 39—44, Copenhagen, 1934.
- Kamiya, S. The distribution of tension in the nets. I. Bull. Japan. Soc. Sci. Fish., III, No. 1, 5—7, Tokyo, 1934. (In Japanese, English Résumé).
- Phillips, J. B. Changes in Sardine Fishing Gear in the Monterey Region, with a note on expansion of fishing grounds. California Fish and Game, XX, 134—39, 1934.
- Schnakenbeck, W. Versuche zur Feststellung von Fischeschwärmen durch das Echolot. Fischmarkt, N. F. II, 204—07, 1934.
- Tauti, M. The force acting on the plane net in motion through the water. Bull. Japan. Soc. Sci. Fish., III, No. 1, 1—4, Tokyo, 1934.
- Uno, M. Influence of Preservative Dye on the weakening of nets. Bull. Japan. Soc. Sci. Fish., III, 83—86, Tokyo, 1934. (In Japanese, English Résumé).
- Zwinkler, E. Change doors to save fuel costs. Fishing Mag., New York, February 1934.

## Fish.

### GENERAL

- D'Ancona, U. Le specie mediterranee del genere *Syngnathus*. R. Com. Talassogr. Ital., Mem. CCX, Venezia, 1934.
- Anon. Der Sandspierling, einer der häufigsten Fische. Fischmarkt, N. F. II, 176—81, 1934.
- Beebe, W. Deep-Sea Fishes of the Bermuda Oceanographic Expeditions. Family Idiocanthidae. Zoologica, XVI, 149—241, New-York, 1934.
- Daniel, J. F. The Elasmobranch Fishes. 3rd Edit. Berkeley, Cal., U. S. A. 1934.
- Fick, H. Vom Maifischfang auf der Unterelbe. Fischmarkt, N. F. II, 175—76, 1934.
- Fowler, H. W. Descriptions of new fishes obtained 1907 to 1910, chiefly in the Philippine Islands and adjacent seas. Proc. Acad. Nat. Sci. Philadelphia, LXXXV, 1933, 233—367, 1934.
- Le Gall, J. Le Tassergal ou Blue Fish (*Temnodon saltator* L.). Résumé des connaissances acquises sur la biologie et l'utilisation de ce poisson. Rev. Trav. Office des Pêches Marit., VII, 27—85, Paris, 1934.
- Hardy, A. C. Hull as centre of great Fishery Research Survey. Fishing News, 22, 23—VI—34.
- Joubin, L. Faune Ichthyologique de l'Atlantique Nord. No. 15. Cons. Perm. Internat. p. l'Explor. de la Mer, Copenhagen, 1934.
- Petrow, W. W. Zur Systematik des eurasischen Stints (*Osmerus eperlanus* L.). Zool. Anz., CVII, 177—88, 1934.
- Poulsen, E. M. On the Remarkable Inflow of Coalfish Larvae into the Kattegat in 1932. Cons. Perm. Internat. p. l'Explor. de la Mer, Rapp. et Proc.-Verb., LXXXIX, 3ème partie, 81—83, Copenhagen, 1934.
- Scott, E. O. G. Observations on some Tasmanian Fishes, with descriptions of new species. Pap. and Proc. Roy. Soc. Tasmania, 1933, 31—53, Hobart, 1934.

### PHYSIOLOGY AND BEHAVIOUR

- Beauvalet, H. Physiology of the Spleen in Teleosteans. C. R. Soc. Biol. Paris, CXIII, 983, 1933.
- Bini, G. Gli ammino acidi nella nutrizione. Determinazione dei gruppi azotati caratteristici del tessuto muscolare di *Dentex filus*. Boll. Pesca, Piscicult. e Idrobiol. X, 215—35, Roma, 1934.
- Birnie, J. H. Regeneration of the Tail-fins of *Fundulus* Embryos. Biol. Bull., Woods Hole, Mass. LXVI, 316—25, 1934.
- Boucher-Firly, S. Sur quelques constituants chimiques du sang de Congre et de Murène. Bull. Inst. Océanogr. No. 651, Monaco, 1934.

- Boyle, E. The irradiation of a turbot vitamin A concentrate with homogeneous ultra-violet radiation. *Biochem. Journ.*, XXVIII, 573—74, 1934.
- Chesley, L. C. The Concentrations of Proteases, Amylase, and Lipase in certain Marine Fishes. *Biol. Bull.*, Woods Hole, Mass., LXVI, 133—44, 1934.
- Cole, W. H. and Allison, J. B. Stimulation by the mineral acids, hydrochloric, sulfuric and nitric, in the sunfish *Eupomotis*. *Journ. Gen. Physiol.*, XIV, 677—84, Baltimore, 1933.
- Edisbury, J. R., Morton, R. A. and Lovern, J. A. Absorption Spectra in Relation to the Constituents of Fish Oils. *Biochem. Journ.*, XXVII, 1451—60, London, 1933.
- Edisbury, J. R., Morton, R. A. and Lovern, J. A. Variations in Vitamin A Content of Fish-Liver Oils, with particular reference to Seasonal Fluctuations in the Potency of Halibut-Liver Oil. *Biochem. Journ.*, XXVII, 1461—69, London, 1933.
- Goodrich, H. B., Dee, J. E., Flynn, C. M. and Mercer, R. M. Germ Cells and Sex Differentiation in *Lebistes reticulatus*. *Biol. Bull.*, Woods Hole, Mass., LXVII, No. 1, 83—96, 1934.
- Green, A. A. and Root, R. W. The Equilibrium between Hemoglobin and Oxygen in the Blood of certain Fishes. *Biol. Bull.*, Woods Hole, Mass., LXIV, 383—404, 1933.
- Hoagland, H. Electrical Responses from Lateral-Line Nerves of Fishes. *Journ. Gen. Physiol.*, XVII, 77—82, Baltimore, 1933.
- Karrer, P., Morf, R. und Schopp, K. Zur Kenntnis des Vitamins-A aus Fischtranen. II. *Helvetica Chimica Acta*, XIV, 1431—36, 1931.
- Koller, G. Über den Farbwechsel von Coregonenlarven. *Biol. Zentralbl.*, LIV, 419—36, Leipzig, 1934.
- Lovern, J. A. Fat metabolism in fishes. III. Selective formation of fat deposits. *Biochem. Journ.*, XXVIII, 394—402, London, 1934.
- Parker, G. H. The Color Changes of Elasmobranch Fishes. *Proc. Nat. Acad. Sci.*, XIX, 1038—39, Washington, 1933.
- Reznikoff, P. and D. G. Hematological Studies in Dogfish (*Mustelus canis*). *Biol. Bull.*, Woods Hole, Mass., LXVI, 115—23, 1934.
- Schueett, F. Studies in mass physiology. The activity of Goldfishes under different conditions of aggregation. *Ecology*, XV, 258—62, Brooklyn, N. Y., 1934.
- Shannon, J. A. Absorption and Excretion of Water and Salts by the Elasmobranch Fishes. IV. The Secretion of Exogenous Creatinine by the Dogfish. *Journ. Cell. and Comp. Physiol.*, IV, 211, 1934.
- Sumi, M. and Kawakami, K. On the vitamin-D value of several fish-liver oils. *Bull. Inst. Phys. and Chem. Res.*, XII, 401—04, 1933. (In Japanese, English Résumé).
- Sumner, F. B. Studies of the Mechanism of Color Changes in Fishes. *James Johnstone Mem. Volume*, 62—80, Liverpool, 1934.
- Suyehiro, Y. Studies on the Digestive System and the Feeding Habit of the Important Fishes of the North Pacific. II. The Plaice, *Lepidopsetta mochigarei* Snyder and the Halibut, *Hippoglossoides elassodon* Jordan and Gilbert. *Bull. Japan. Soc. Sci. Fish.*, III, 65—72, Tokyo, 1934. (In Japanese, English Résumé).
- Truesdail, R. W. and Culbertson, H. J. Sardine and tuna oils as sources of vitamin D. *Indust. and Engin. Chem.*, XXV, 563—64, Easton, Pa., 1934.
- Truesdail, R. W. and Shahinian, L. Vitamins A and D in tuna meal. *Indust. and Engin. Chem.* XXV, 661—62, Easton, Pa., 1933.
- Weidermann, G. Studies on the chemical nature of the unsaponifiable fraction of fish-liver oils. II. Cod-liver oil. *Biochem. Journ.*, XXVI, 264—68, London, 1932.
- Yasaki, Y. The studies on the luminescence of the knight fish (*Monocentris japonicus* Houttuyn). *Jap. Journ. Med. Sci.* III, Biophysics, I, 73, 1930.

## EGGS AND LARVAE

- de Gaetani, D. Uova, sviluppo embrionale e stadi post-embrionali negli Sparidi. 2. *Pagellus centrodonatus* De la Roche. *R. Com. Talassogr. Ital.*, Mem. CCIX, Venezia, 1934.
- Salfi, M. Sulla metamorfosi dell' *Uranoscopus scaber* L. *Pubbl. Staz. Zool. di Napoli*, XIII, 303—10, Roma, 1933.
- Sanzo, L. Uova stadi larvali e giovanili di *Dactylopterus volitans* L. *R. Com. Talassogr. Ital.*, Mem. CCVII, Venezia, 1934.
- Worley, L. G. Development of the egg of the mackerel at different constant temperatures. *Journ. Gen. Physiol.*, XVI, 841—57, Baltimore, 1933.

## FISH PARASITES AND DISEASES

- Anon. Second Interim Report of the Furunculosis Committee. Edinburgh and London, 1933.
- Anon. Quallen als Fischfeinde. Fischmarkt, N. F. II, 215—17, 1934.
- Fish, F. F. A Fungus Disease in Fishes of the Gulf of Maine. Parasitology, XXVI, 1—16, Cambridge, 1934.
- Jones, E. I. On *Ceratotrema Furcolabiata* n. g. et n. sp. and *Hemipera sharpei* n. sp. Two New Digenetic Trematodes of British Marine Fishes. Parasitology, XXV, 248—54, Cambridge, 1933.
- Jones, E. I. Fertilisation and Egg Formation in a Digenetic Trematode, *Podocotyle atomom*. Parasitology, XXIV, 545—47, Cambridge, 1933.
- Kahl, A. Ciliata entocommensalia et parasitica. Tierwelt der Nord- und Ostsee (Grimpe und Wagler), Teil II.c4. Leipzig, 1934.
- Leigh-Sharpe, W. H. A Third List of Parasitic Copepoda of Plymouth with Notes. Parasitology, XXVI, 112—13, Cambridge, 1934.
- Linton, E. Some Observations on the Distribution of Helminth Entozoa of Fishes of the Woods Hole Region (Massachusetts, U. S. A.). James Johnstone Mem. Volume, 121—31, Liverpool, 1934.
- Mathias, P. Sur quelques Trématodes de Poissons marins de la région de Banyuls. Arch. Zool. Expér. et Gén., LXXXV, Fasc. 33, Paris, 1934.
- Nybelin, O. Nya undersökningar över kräftpestens orsak. Ny Svensk Fiskeritidskr. Nr. 10, 110—14, 1934.
- Sprehn, C. Cestoidea. Tierwelt der Nord- und Ostsee (Grimpe und Wagler), Teil IV.c2. Leipzig, 1934.
- Stekhoven, J. H. S. Nematomorpha. Tierwelt der Nord- und Ostsee (Grimpe und Wagler), Teil VI, f. Leipzig, 1934.
- Stunkard, H. W. On the Trematode Genus *Teloporia Fukui*, 1933. Zool. Anz., CVI, 218—20, 1934.
- Wells, N. A. and ZoBell, C. E. *Achromobacter ichthyodermis*, n. sp., the Etiological Agent of an infectious Dermatitis of certain marine fishes. Proc. Nat. Acad. Sci., XX, 123—26, Washington, 1934.

## FOOD OF FISH

- Valiani, S. Contributo allo studio dell'alimentazione dei pesci — *Trigla lyra* L., *Trigla gurnardus* L. Boll. Pesca, Piscicol. e Idrobiol., X, 37—46, Roma, 1934.

## AGE DETERMINATION

- Van Oosten, J., Deason, H. J. and Jobes, F. W. A Microprojection Machine designed for the Study of Fish Scales. Journ. du Conseil, IX, 241—48, Copenhagen, 1934.

## PLAICE AND OTHER PLEURONECTIDS

- Anon. Transplanting of young Plaices. Nordisk Havfisk. Tidsskr., 8. Aargang, Nr. 5, 29, København, 1934.
- Bjerkan, P. Marking Experiments of Plaice (*Pleuronectes platessa*). Cons. Perm. Internat. p. l'Explor. de la Mer, Rapp. et Proc.-Verb., LXXXVIII, No. VI, Copenhagen, 1934.
- Bowman, A. Marking Experiments on Lemon Soles in Scottish Waters during the period 1919—1931 (inclusive). Cons. Perm. Internat. p. l'Explor. de la Mer, Rapp. et Proc.-Verb., LXXXIX, 3ème partie, 53—56, Copenhagen, 1934.
- Bückmann, A. Über ein Mindestmass für die Seezunge der Nordsee. Cons. Perm. Internat. p. l'Explor. de la Mer, Rapp. et Proc.-Verb., XC, 33—37, Copenhagen, 1934.
- Bückmann, A. Untersuchungen über die Naturgeschichte der Seezunge, die Seezungenbevölkerung und den Seezungenfang in der Nordsee. Ber. Deutsch. wiss. Komm. f. Meeresf., N. F. VII, 50—114, Leipzig, 1934.
- Clark, R. S. Scottish Seine Net Investigations. Cons. Perm. Internat. p. l'Explor. de la Mer, Rapp. et Proc.-Verb., XC, 49—57, Copenhagen, 1934.
- Daniel, R. J. and Fleming, R. A. Plaice Marking Experiments in the Irish Sea, 1929—31. Rep. for 1932 (No. 41) Lancs. Sea Fish. Lab., 17—20, Liverpool, 1933.
- Jensen, A. J. C. Contribution to an Investigation into the most profitable Size-Limit for Plaice in the North Sea. Cons. Perm. Internat. p. l'Explor. de la Mer, Rapp. et Proc.-Verb., CX, 45—48, Copenhagen, 1934.
- Kändler, R. Schollenverpflanzungen in Dänemark. Fischmarkt, N. F. II, Heft 6, 144—47, 1934.
- Laurinat, K. Die Wiederfänge von in der mittleren und westlichen Ostsee markierten Klieschen. Mitt. Deutsch. Seefisch.-Ver., XLIX, 238—41, 1934.

## HALIBUT.

- Thompson, W. F. and Bell, F. H. Biological Statistics of the Pacific Halibut Fishery. (2) Effect of changes in intensity upon total yield and yield per unit of gear. Rep. Internat. Fish. Comm. No. 8, Seattle, Washington, 1934.

## COD.

- Anon. Icy Water means abundance of Cod. Fishing News, 8, 7-VII-34.
- Graham, M. The North Sea Cod. Journ. du Conseil, IX, 159—71, Copenhagen, 1934.
- Lundbeck, J. Veränderungen in der Nutzung des Arktisch-Norwegischen Kabeljaubestandes durch die neue Trawlfischerei an der norwegischen Küste. Cons. Perm. Internat. p. l'Explor. de la Mer, Rapp. et Proc.-Verb., LXXXIX, 3ème partie, 3—4, Copenhagen, 1934.
- Lundbeck, J. Überblick über die Ergebnisse der Marktuntersuchungen an deutschen Fängen aus dem Barentsmeer und von der Bäreninsel in den Jahren 1929 bis 1933. Cons. Perm. Internat. p. l'Explor. de la Mer, Rapp. et Proc.-Verb., LXXXVIII, No. 1, Copenhagen, 1934.
- McKay, C. Water temperatures for cod fishing. Canadian Fisherman, March 1934.
- McKenzie, R. A. Cod Movements on the Canadian Atlantic Coast. Contrib. Canad. Biol. and Fish., N. S. VIII, 433—58, Toronto, 1934.
- McKenzie, R. A. The Relation of the Cod to Water Temperatures. Canadian Fisherman, 11—14, July 1934.
- Rollefsen, G. The Cod Otolith as a Guide to Race, Sexual Development and Mortality. Cons. Perm. Internat. p. l'Explor. de la Mer, Rapp. et Proc.-Verb., LXXXVIII, No. II, Copenhagen, 1934.
- Schmit, W. Über die Laichplätze von Kabeljau im Beringmeere und Morphologie der Larven von Stillozeanischen Kabeljau. Bull. Far Eastern Branch Acad. Sci. of the U.S.S.R. No. 1—2—3, 79—86, Wladiwostok, 1933. (In Russian, German Résumé).
- Sund, O. La pêche de la Morue en Norvège. Pêche Marit., Peche Fluviale et Piscicult., XVII, 126—29, 1934.
- Sund, O. Cod-Measurements during 21 Years on the Western and Northern Coasts of Norway. Methods and Results. Cons. Perm. Internat. p. l'Explor. de la Mer, Rapp. et Proc.-Verb., LXXXVIII, No. VII, Copenhagen, 1934.
- Suyehiro, Y. Studies on the digestive system and the feeding habit of the important fishes of the North Pacific. I. The cods, *Cadus macrocephalus* Tilesius and *Theragra chalcogramma* (Pallas). Bull. Japan. Soc. Sci. Fish., III, No. 1, 8—16, Tokyo, 1934. (In Japanese, English Résumé).
- Táning, A. V. Survey of Long Distance Migrations of Cod in the North Western Atlantic according to Marking Experiments. Cons. Perm. Internat. p. l'Explor. de la Mer, Rapp. et Proc.-Verb., LXXXIX, 3ème partie, 5—11, Copenhagen, 1934.

## HADDOCK

- Lundbeck, J. Überblick über die Ergebnisse der Marktuntersuchungen an deutschen Fängen aus dem Barentsmeer und von der Bäreninsel in den Jahren 1929 bis 1933. Cons. Perm. Internat. p. l'Explor. de la Mer, Rapp. et Proc.-Verb., LXXXVIII, No. I, Copenhagen, 1934.
- Vladykov, V. D. Young Haddock in the vicinity of Halifax, N. S. Contrib. Canad. Biol. and Fish., N. S. VIII, 409—19, Toronto, 1934.

## HAKE

- Battle, H. I. Hake Fishery concentrated at mouth of Bay of Fundy. Progress Rep., Atlantic Biol. Stat., St. Andrews, N. B., No. 11, 12—14, 1934.

## TUNNY

- Ehrenbaum, E. Thunfische in den nordeuropäischen Gewässern. Fischmarkt, N. F. II, 116—19, 1934.
- Frade, F. et Managas, S. Sur l'état de maturité des gonades chez le Thon Rouge génétique. Comptes rendus de l'Assoc. des Anatomistes. Vingt-huitième Réunion (Lisbonne, 10—12 Avril 1933), 1933. Trav. Stat. Biol. Marit. de Lisbonne, No. 33, 1933.
- Russell, F. S. Tunny Investigations made in the North Sea on Col. E. T. Peel's Yacht, „St. George“, Summer, 1933. Part I. Biometric Data. Journ. Mar. Biol. Assoc. U. K., N. S. XIX, 503—22, Plymouth, 1934.
- Scordia, C. Su di alcune recenti pubblicazioni relative alla Biologia del Tonno. Mem. di Biol. Mar. e di Oceanogr., II, App., Messina, 1934.

- Scordia, C. Per la biologia del Tonno (*Thunnus thynnus* L.). IV. Osservazioni eseguite nelle tonnare di Bivona e di Pizzo (Calabria) nel Maggio-Giugno 1931. Mem. di Biol. Mar. e di Oceanogr. II, N. 2, Messina, 1933.
- Scordia, C. Per la biologia del Tonno (*Thunnus thynnus* L.). V. Osservazioni eseguite nelle tonnare di Bivona (Calabria) nel Giugno 1932, con riferimenti alle tonnare di Pizzo e di Mezzapraia. Mem. di Biol. Mar. e di Oceanogr. III, N. 1, Messina, 1934.
- Scordia, C. Per la biologia del Tonno (*Thunnus thynnus* L.). VI. Ulteriori osservazioni sui tonni dello stretto di Messina. Mem. di Biol. Mar. e di Oceanogr., III, N. 2, Messina, 1934.
- Scordia, C. Per la biologia del Tonno (*Thunnus thynnus* L.). VII. Ricerche preliminari sulla quantita e sulla distribuzione delle sostanze grasse contenute nelle gonadi e nel fegato dei tonni intergenetici. Mem. di Biol. Mar. e di Oceanogr. III, N. 3, Messina, 1934.
- Takayama, I. and Andô, S. A study of the "Magro" (*Thunnus*) fishing in 1930. Journ. Imp. Fish. Exper. Stat. No. 5, 1—21, Tokyo, 1934. (In Japanese, English Résumé).
- Taylor, F. Tunny Fishing for Beginners. London, 1934.

#### HERRING

- Anon. Prospects for East Anglia. Fishery will reach its Maximum round about October 22nd, says this Official Forecast. Fish Trades Gaz., 16, 8—IX—34.
- Gilson, G. Annual Concentration of Spent Herring along the French and Belgian Coasts in 1933—1934. Cons. Perm. Internat. p. l'Explor. de la Mer, Rapp. et Proc.-Verb., LXXXIX, 3ème partie, 101—03, Copenhagen, 1934.
- Godtfredsen, A. Det danske Sildefiskeri ved Island. Nordisk Havfisk. Tidsskr. 8. Aarg., Nr. 8, 5—7, 1934.
- Hardy, A. C. The Plankton Indicator. Experiments, Tests and now ready for general use. Fish Trades Gaz., 18—19, 12—V—34.
- Hodgson, W. C. Result of the 1933 Herring Forecast. Calculation of the Age-composition of Stock again proves accurate and reliable. Fishing News, 22—23, 26—V—34.
- Huntsman, A. G. Herring and Water Movements. James Johnstone Mem. Volume, 81—96, Liverpool, 1934.
- Lebour, M. V. Rissoid Larvae as Food of the Young Herring. The Eggs and Larvae of the Plymouth Rissoidae. Journ. Mar. Biol. Assoc., U. K., N. S. XIX, 523—39, Plymouth, 1934.
- Ogilvie, H. S. A Preliminary Account of the Food of the Herring in the North-Western North Sea. Cons. Perm. Internat. p. l'Explor. de la Mer, Rapp. et Proc.-Verb., LXXXIX, 3ème partie, 85—92, Copenhagen, 1934.
- Ottestad, P. Statistical Analysis of the Norwegian Herring Population. Cons. Perm. Internat. p. l'Explor. de la Mer, Rapp. et Proc.-Verb., LXXXVIII, No. III, Copenhagen, 1934.
- Runnstrøm, S. The Pelagic Distribution of the Herring Larvae in the Norwegian Waters. Cons. Perm. Internat. p. l'Explor. de la Mer, Rapp. et Proc.-Verb., LXXXVIII, No. V, Copenhagen, 1934.
- Savage, R. E. and Hodgson, W. C. Lunar Influence on the East Anglian Herring Fishery. Journ. du Conseil, IX, 223—39, Copenhagen, 1934.
- Sea Fish Commission for the United Kingdom. First Report — The Herring Industry. London, 1934.
- Tesch, J. J. Herring Races in the Southern North Sea. Cons. Perm. Internat. p. l'Explor. de la Mer, Rapp. et Proc.-Verb., LXXXIX, 3ème partie, 45—52, Copenhagen, 1934.
- Wood, H. The Natural History of the Herring in Scottish Waters. The Buckland Lectures, Third Series for 1932, Aberdeen, 1934.
- Wood, H. Scottish Investigations on Adult Herring Shoals in the North Western North Sea, 1933. Cons. Perm. Internat. p. l'Explor. de la Mer, Rapp. et Proc.-Verb., LXXXIX, 3ème partie, 57—67, Copenhagen, 1934.

#### PILCHARD, SPRAT AND ANCHOVY

- Bahr, K. Sardelle (*Engraulis encrasicolus*, Cuv.) vor der ostpreussischen Samlandküste. Mitt. Deutsch. Seefisch-Ver., XLIX, 246, 1934.
- Battle, H. I. Temperature and "Clearing" Time for the Sardine. Progress Rep., Atlantic Biol. Stat., St. Andrews, N. B., No. 11, 14—16, 1934.
- Meyer, P. F. Über das Vorkommen von Sardellenschwärmen (*Engraulis encrasicolus* L.) und von Bastard-Makrelen (*Caranx trachurus* L.) in der Ostsee. Mitt. Deutsch. Seefisch-Ver., XLIX, 242—45, 1934.



- Molander, A. R. Skarpsillfiske och årsklasser. Ny Svensk Fiskeritidskr., Nr. 17, 197—200, 1934.
- Ramalho, A. Fluctuation saisonnière du poids moyen de la Sardine (*Sardina pilchardus*). C. R. Séances de la Soc. de Biologie, CXIII, 754, 1933. Trav. Stat. Biol. Marit. de Lisbonne, No. 32, 1933.

#### MACKEREL

- Jensen, A. J. C. Utsikterna for makrillfisket i Kattegat—Skagerak, 1934. Ny Svensk Fiskeritidskr., Nr. 10, 114—16, 1934.
- Sette, O. Outlook for the Mackerel Fishery, 1934. U. S. Bureau Fish., Fish. Circ. No. 17, Washington, D. C., 1934.
- Sette, O. E., and Needler, A. W. H. Statistics of the Mackerel Fishery off the East Coast of North America 1804 to 1930. U. S. Bureau Fish., Invest. Rep. No. 19, Washington, D. C. 1934.

#### EELS

- Hornoyold, A. G. Observations sur la taille et le sexe de deux cents petites Anguilles argentées des Valli de Comacchio. Bull. Soc. Cent. d'Aquicult. et de Pêche, XLI, 43—50, Paris, 1934.
- Hornoyold, A. G. La Civelle de Sète de janvier et février 1934. Bull. Soc. Cent. d'Aquicult. et de Pêche, XLI, 71—76, Paris, 1934.
- Rodolico, A. Differenziamento dei sessi ed ovo-spermatogenesi nell'anguilla (Ricerche istologiche e sperimentali). Pubbl. Staz. Zool. di Napoli, XIII, 180—278, Roma, 1933.
- Schnakenbeck, W. Neuere Beobachtungen über den Aalaufstieg. Fischmarkt, N. F. II, 209, 1934.

#### SKATES AND RAYS

- Steven, G. A. Observations on the Growth of the Claspers and Cloaca in *Raia clavata* Linnaeus. Journ. Mar. Biol. Assoc. U. K., N. S. XIX, 887—99, Plymouth, 1934.

#### FRESHWATER FISH

- Foerste, R. E. An investigation of the life history and propagation of the sockeye salmon (*Oncorhynchus nerka*) at Cultus lake, British Columbia. No. 4. The life history cycle of the 1925 year class with natural propagation. Contrib. Canad. Biol. and Fish., N. S. VIII, 345—55, Toronto, 1934.
- Ljungdahl, K. G. Laxräkningen vid Norrfors. Ny Svensk Fiskeritidskr., Nr. 12, 133—38, 1934.
- Needham, P. R. Notes on the Food of Trout. California Fish and Game, XX, 119—27, Sacramento, 1934.
- Pritchard, A. L. Pacific Salmon Migration: The Tagging of the Spring Salmon in British Columbia in 1929 and 1930. Bull. Biol. Board of Canada, XLI, Ottawa, 1934.
- Rawson, D. S. Productivity Studies in Lakes of the Kamloops Region, British Columbia. Bull. Biol. Board of Canada, XLII, Ottawa, 1934.
- Slack, H. D. The Winter Food of Brown Trout (*Salmo trutta* L.). Journ. Animal Ecology, III, 105—08, Cambridge, 1934.

#### Freshwater and Pollution.

- Garner, J. H. Sanitation and Water Purification. Rep. Progress Applied Chem., XVIII, 679—710, Cambridge, 1934.
- Oosting, H. J. Physical-chemical variables in a Minnesota lake. Ecol. Monogr. III, 493—533, 1933.
- Rawson, D. S. Productivity Studies in Lakes of the Kamloops Region, British Columbia. Bull. Biol. Board of Canada, XLII, Ottawa, 1934.
- Shaw, P. A. Stream and Bay Pollution Studies. California Fish and Game, XX, 128—29, Sacramento, 1934.

#### Oysters and other Lamellibranchs.

- Bigger, J. W. The Bacteriological Examination of Shellfish. Journ. of Hygiene, XXXIV, 172—94, 1934.
- Coulson, E. J. The Iodine Content of Oysters. U. S. Bureau Fish., Invest. Rep. No. 18, Washington, D. C. 1934.

- Coulson, E. J. Levine, H. and Remington, R. E. Oysters and anemia. Amer. Journ. Publ. Health and Nation's Health, XXII, 1141—46, 1932.
- Galtsoff, P. S. The use of slag for oyster culture. Fishing Mag., New York, March 1934.
- Miyasaki, I. On the food organisms of Oysters (1). Bull. Japan. Soc. Sci. Fish., III, 73—74, Tokyo, 1934. (In Japanese, English Résumé).
- Orton, J. H. Bionomical Studies on *Cardium edule* with special reference to mortality in 1933. James Johnstone Mem. Volume, 97—120, Liverpool, 1934.
- Roughley, T. C. The Australian Oyster. Nature, CXXXIV, 66, 1934.
- Stevenson, J. A. The Growth Rate of Canadian Scallops. Progress Rep., Atlantic Biol. Stat., St. Andrews, N. B., No. 11, 10—11, 1934.
- Yasukawa, Y. Studies on the Colon Bacteria from Oysters. Bull. Japan. Soc. Sci. Fish., III, 77—79, Tokyo, 1934. (In Japanese, English Résumé).

#### Crustacea.

- Dewberry, E. Habits and haunts of edible crabs. Fishing News, 22—23, 4—VIII—34.
- Smith, W. C. A Lobster-Rearing Experiment contributing some addition to knowledge of the Early Life-History of *Homarus vulgaris*. Rep. for 1932 (No. 41) Lancs. Sea Fish. Lab., 5—16, Liverpool, 1933.
- Templeman, W. Mating in the American Lobster. Contrib. Canad. Biol. and Fish., N. S. VIII, 421—32, Toronto, 1934.

#### Whales and Seals.

- Birula, A. A. Über die Seesäugetiere des Weissen Meeres. Zool. Anz., CVII, 10—22, Leipzig, 1934.
- Damant, G. C. C.; Krogh, A. Physiology of Deep-Diving in the Whale. Nature, CXXXIII, 874, 1934.
- Gray, R. W. Breathing movements of Whales. Nature, CXXXIII, 797—98, 1934.
- Green, A. A. and Redfield, A. C. On the Respiratory Function of the Blood of the Porpoise. Biol. Bull., Woods Hole, Mass., LXIV, 44—52, 1933.
- Matheson, C. and Cowley, L. F. *Pseudorca crassidens* (Owen) on the Glamorgan Coast. Nature, CXXXIII, 874, 1934.
- Schmidt, E. Die Antarktis ruft! Fischmarkt, N. F. II, 119—20, 1934.
- Steven, G. A. A Short Investigation into the Habits, Abundance and Species of Seals on the North Cornwall Coast. Journ. Mar. Biol. Assoc. U. K., N. S. XIX, 489—501, Plymouth, 1934.
- Suzuki, M. Über den Darminhalt des Pottwals. Japan. Journ. Med. Sci. II. Biochem. II, 7—9, 1933.

#### Biological-Miscellaneous.

- Russell, E. S. Johnstone and the Philosophy of Biology. James Johnstone Mem. Volume, 12—21, Liverpool, 1934.
- Schulz, B. Die Eigenschaften des Meerwassers und deren Bedeutung für den Menschen. La Cure Marine, 2, 1933.
- Uvarov, B. P. Geochemistry of Living Matter. Nature, CXXXIV, 11—12, 1934.
- Vallin, S. Smakförsämring hos fisk. Ny Svensk Fiskeritidskr., Nr. 16, 185—89, 1934.
